## Prize Crossword

N.A. Davies

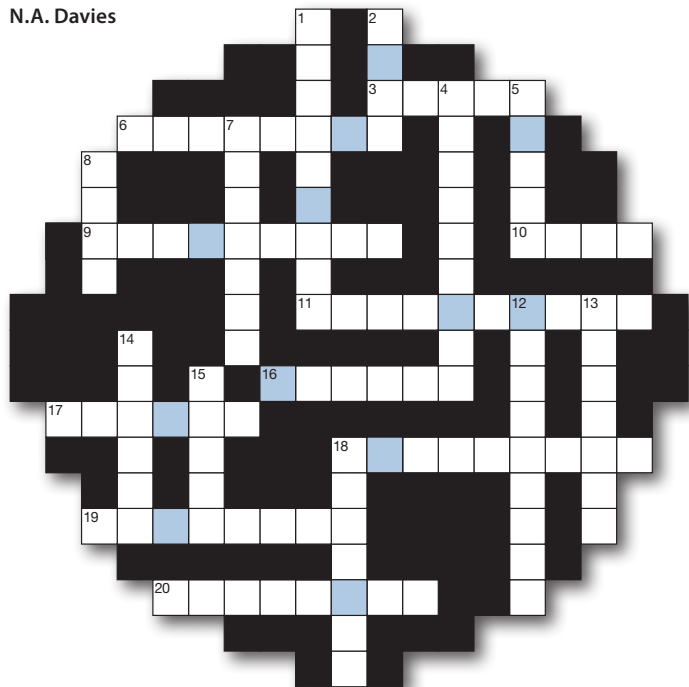

### Across

3. A chemical spill creates \_\_\_ legged freaks (5)
6. \_\_\_ of men, Clive Owen faces infertility issues (8)
9. A vaccine creates zombies, Will Smith is on hand to find a cure (1,2,6)
10. Green and incredible (4)
11. True story based on the effects of L-dopa (10)
16. The \_\_\_, where clones created for spare parts live (6)
17. Jeff Goldblum mixes his DNA in this 1986 remake (3,3)
18. Wall-crawling fun for Toby Maguire (9)
19. Space based adventure, not as calm as the title suggests (8)
20. Dustin Hoffman has to contain an 'Ebola-like' catastrophe (8)

### Down

1. The \_\_\_ Strain, 1971 movie based on Michael Crichton's book (9)
2. DNA mutations lead to superpowers (1,3)
4. Stanley \_\_\_, the biochemical hero of 'The Rock' (9)
5. Environmentally inconvenient (5)
7. The boy who needed the oil (7)
8. More zombies, this time they are resident (4)
12. The \_\_\_, Matt Damon blows the whistle on lysine price fixing (9)
13. Ethan Hawke struggles with eugenics (7)
14. The number of monkeys in a time twisting plot about a deadly virus (6)
15. Wesley Snipes battles vampires with EDTA (5)
18. It's green, and made from humans! (7)

Solutions to the crossword featured in the October 2015 issue are: **Across:** 2.Thumb, 6.Blush, 10.Language, 11.Origin, 12.Diet, 14.Larynx, 15.Species, 19.Clothing, 20.Variation, 21.Epigenetic

**Down:** 1.Chimpanzee, 3.Behaviour, 4.Pelage, 5.Mutation, 6.Biped, 7.DNA, 8.Brain, 9.Family, 13.Empathy, 16.Culture, 17.Hominin, 18.Cortex

## Crossword Competition

### Win

This month's crossword prize is a smartphone projector, so you can watch all the exciting movies and TV series mentioned in this issue on the 'big screen' through your phone.

Simply email the missing word, made up from letters in the highlighted boxes, to [biochemist@biochemistry.org](mailto:biochemist@biochemistry.org) by 18 January 2016. Please include the words 'December crossword competition' in the email subject line.

### Congratulations to October's winner:

Patrick Murphy (University of Sheffield)

The missing word from last issue's competition was "Homo Sapiens".

Patrick received *Sapiens: A Brief History of Humankind*, by Yuval Noah Harari and a copy of *The Incredible Unlikelihood of Being: Evolution and the Making of Us*, by Alice Roberts.

Terms and conditions: only one entry per person, entrant must be a current Biochemical Society member; closing date 18 January 2016. The winner will be drawn independently at random from the correct entries received. The winner will receive a smartphone projector. No cash alternative available. No employee, agent, affiliate, officer or director of Portland Press Limited or the Biochemical Society is eligible to enter. The winner will be notified by email within 7 days of the draw. The name of the winner will be announced in the next issue of *The Biochemist*. The promoter accepts no responsibility for lost or delayed entries. Promoter: Biochemical Society, Charles Darwin House, 12 Roger Street, London WC1N 2JU; do not send entries to this address.

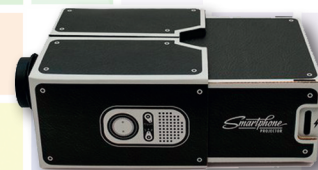

Source: https://port.silverchair.com/biochemist/article-pdf/37/6/56/5528/bio037060056.pdf
